# Supplementary material for: Environmental water body characteristics in a major tributary backwater of the unique and strongly seasonal Three Gorges Reservoir, China
Source: Royal Society of Chemistry journal article supplement (doi:10.1039/c5em00201j), 2015-01-01
Supplement: c5em00201j1.pdf [file c5em00201j1.pdf]

Electronic Supplementary Information

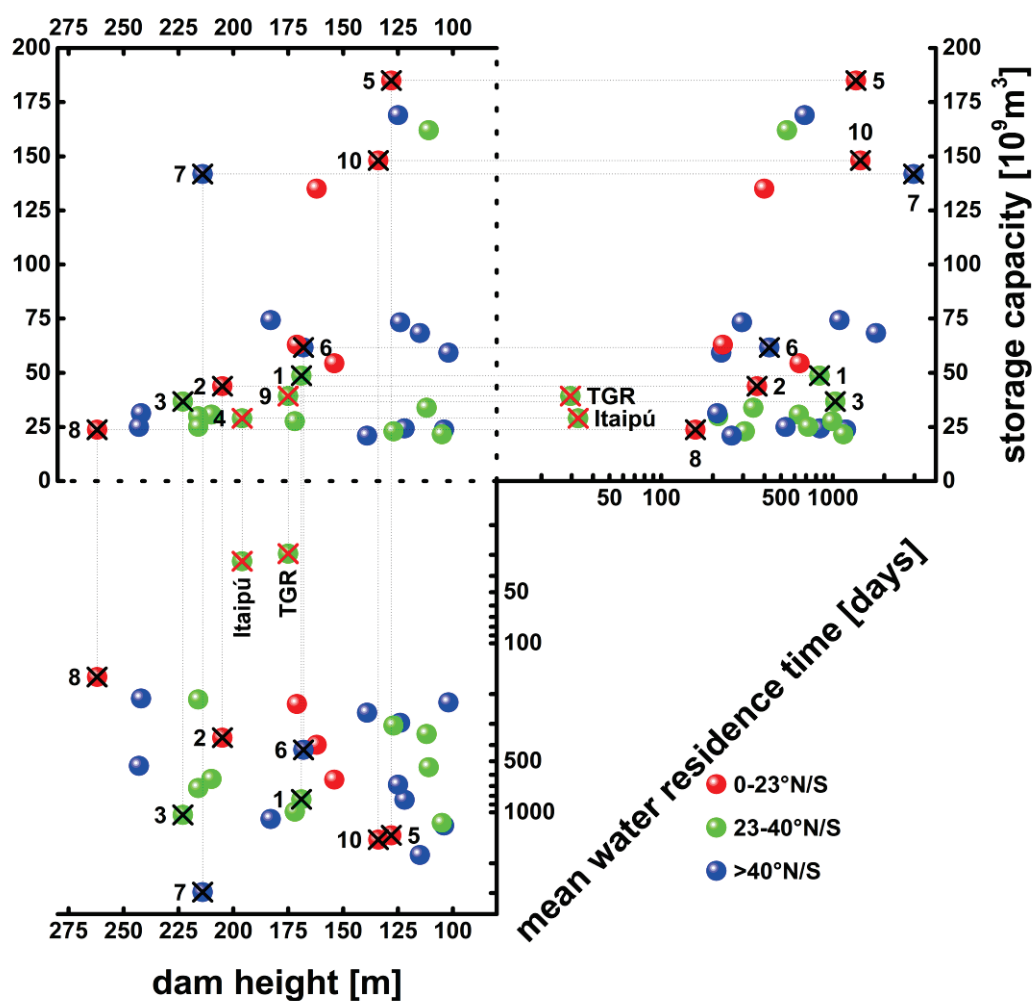

ESI Fig. 1 Properties of dams and reservoirs worldwide with dam heights > 100 m and storage capacities > 20\*10<sup>9</sup> m<sup>3</sup>. The TGR and the Itaipú Reservoir have comparable magnitudes, are located in the sub-tropics, and have exceptionally low mean water residence times.<sup>1,42,43,44,45,46</sup> Crossed and numbered points refer to ESI Table 1.

**ESI Table 1** Properties of selected dams and reservoirs worldwide with dam heights > 100 m and storage capacities > 20\*10<sup>9</sup> m<sup>3</sup>. The TGR and the Itaipú Reservoir have comparable magnitudes, are located in the sub-tropics, have exceptionally low mean water residence times (MWRT), and are polymictic. The TGR, however, is eutrophic and has by far the largest water level fluctuation. Numbers (No.) refer to ESI Fig. 1.

| No.      | Dam name            | Country                | Year        | Dam and Reservoir dimensions |                                             |                              |             | Reservoir Classification |                          |                     |                   |           | References     |
|----------|---------------------|------------------------|-------------|------------------------------|---------------------------------------------|------------------------------|-------------|--------------------------|--------------------------|---------------------|-------------------|-----------|----------------|
|          |                     |                        |             | Dam height [m]               | Res. vol. [10 <sup>9</sup> m <sup>3</sup> ] | Res. area [km <sup>2</sup> ] | ∅ depth [m] | MWRT [days]              | Geographic               | Trophic             | Mixing            | WLF [m]   |                |
| 1        | Atatürk             | Turkey                 | 1992        | 169                          | 49                                          | 817                          | 60          | 838 long                 | 37°N sub-tropical        | eutrophic           | n.a.              | n.a.      | 41,43,50       |
| 2        | Bakun               | Malaysia               | 2011        | 205                          | 44                                          | 695                          | 63          | 362 intermediate         | 3°N tropical             | n.a.                | n.a.              | n.a.      | 41,44,46       |
| 3        | Hoover              | USA                    | 1935        | 223                          | 37                                          | 635                          | 58          | 1035 long                | 36°N sub-tropical        | mesotrophic         | monomictic        | 7         | 41,43,47       |
| <b>4</b> | <b>Itaipú</b>       | <b>Brazil/Paraguay</b> | <b>1983</b> | <b>196</b>                   | <b>29</b>                                   | <b>1350</b>                  | <b>21</b>   | <b>33 intermediate</b>   | <b>25°S sub-tropical</b> | <b>oligotrophic</b> | <b>polymictic</b> | <b>1</b>  | 41,43,44,45,48 |
| 5        | Kariba              | Zimbabwe/Zambia        | 1959        | 128                          | 185                                         | 5540                         | 33          | 1367 long                | 17°N tropical            | mesotrophic         | monomictic        | 3         | 41,43,44       |
| 6        | La Grande 2         | Canada                 | 1977        | 168                          | 62                                          | 2835                         | 22          | 428 long                 | 54°N moderate            | oligotrophic        | dimictic          | 9         | 41,43,44       |
| 7        | Manicouagan         | Canada                 | 1968        | 214                          | 142                                         | 1940                         | 73          | 2961 long                | 51°N moderate            | oligotrophic        | monomictic        | 6         | 41,43,44       |
| 8        | Nuozhadu            | China                  | 2014        | 262                          | 24                                          | 320                          | 74          | 159 intermediate         | 23°N tropical            | n.a.                | n.a.              | n.a.      | 39,41          |
| <b>9</b> | <b>Three Gorges</b> | <b>China</b>           | <b>2003</b> | <b>175</b>                   | <b>39</b>                                   | <b>1084</b>                  | <b>36</b>   | <b>30 intermediate</b>   | <b>31°N sub-tropical</b> | <b>eutrophic</b>    | <b>polymictic</b> | <b>30</b> | 41,43,49       |
| 10       | Volta               | Ghana                  | 1965        | 134                          | 148                                         | 8500                         | 17          | 1452 long                | 6°N tropical             | eutrophic           | polymictic        | 3         | 41,43,44       |

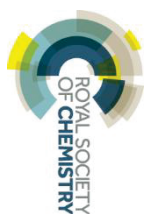

ESI Table 2 Sensors installed on the MINIBAT and their specifications.

| Parameter                     | Producer               | Principle                               | Measuring range                 | Accuracy  | Resolution                    | Response time |
|-------------------------------|------------------------|-----------------------------------------|---------------------------------|-----------|-------------------------------|---------------|
| <b>Pressure</b>               | ADM Elektronik         | piezo-resistive                         | 0 - 200 dbar                    | ±0.1 dBar | 0.005 dbar                    | 0.04 s        |
| <b>O<sub>2</sub></b>          | ADM Elektronik         | Potentiometric (Clark electrode)        | 0 - 150% sat                    | ±2% sat   | 0.02% sat.                    | 3 s (63%)     |
| <b>Temperature</b>            | ADM Elektronik         | Pt 100                                  | -2 - 38°C                       | ±0.01°C   | 0.001°C                       | 0.12 s        |
| <b>El. conductivity</b>       | ADM Elektronik         | 7-pole-cell                             | 0 - 6 mS/cm                     | ±2 µS/cm  | 0.1 µS/cm                     | 0.05 s        |
| <b>pH</b>                     | AMT GmbH               | Potentiometric (Ag/AgCl)                | 0 - 14 pH                       | 0.02 pH   | 0.02 pH                       | 1 s (63%)     |
| <b>H<sub>2</sub>S*</b>        | AMT GmbH               | Amperometric                            | 0 - 10 mg/L                     | ±3%       | 0.03 mg/L                     | <3 s          |
| <b>Chlorophyll <i>a</i>**</b> | Turner designs         | Fluorescence (exc. 465 nm / fl. 696 nm) | 0.03 - 500 µg/L                 |           | 0.01 µg/L                     | 1 s           |
| <b>CDOM***</b>                | Turner designs         | Fluorescence (exc. 325 nm / fl. 470 nm) | 0.15 - 1250 ppb <sub>QS</sub>   | ±5%       | 0.01 ppb <sub>QS</sub>        | 1 s           |
| <b>Turbidity</b>              | Seapoint sensors, Inc. | Mie backscattering                      | 0 - 750 FTU                     | ±2%       | < 0.001%                      | 0.1 s         |
| <b>PAR (400-700 nm)</b>       | LI-COR®                | Photon flux density                     | 0 - 10 mmol/(s*m <sup>2</sup> ) | ±5%       | 0.01 µmol/(s*m <sup>2</sup> ) | 10 µs         |

\*The H<sub>2</sub>S sensor did not operate stable and was not used during data evaluation. \*\*Calibrated against algal monoculture of *Skeletonema costatum*. \*\*\*Calibrated against Quinine Sulfate in 0.05 M H<sub>2</sub>SO<sub>4</sub>.

## Environmental Science: Processes & Impacts

### ARTICLE

#### ESI - Notes and references

- 41 L. Berggren and L. Wallmann, MSc. Thesis, Lund University, 2012.
- 42 Chinese National Committee on Large Dams, *Dam information—Dam Projects—Nuozhadu Hydropower Project*, <http://www.chincold.org.cn>, (accessed 07 November, 2014).
- 43 P. Gong and J. Wan, *Hydropower*, 2006, 1465-1471.
- 44 International Commission on Large Dams, *World Register of Dams*, <http://www.icold-cigb.org>, (accessed 05 March, 2014).
- 45 World Bank, *Malaysia Power Sector Issues and Options*, Report No.6466-MA, 1987.
- 46 B. Lehner, C. Reidy Liermann, C. Revenga, C. Vörösmarty, B. Balazs Fekete, P. Crouzet, P. Döll, M. Endejan, K. Frenken, J. Magome, C. Nilsson, J. Robertson, R. Rödel, N. Sindorf and D. Wisser, *Global Reservoir and Dam database*. Version 1.1, 2011.
- 47 International Lake Environment Committee Foundation, *World Lake Database*, url: <http://wldb.ilec.or.jp/>, (accessed 13 November, 2014).
- 48 R. Ribeiro Filho, M. Petrere Junior, S. Benassi and J. Pereira, *Braz. J. Biol.*, 2011, **71(4)**, 889-902.
- 49 B. Sovacool and L. Bulan, *Energy Policy*, 2011, **39**, 4842-4859.
- 50 Summit Technologies, Inc., *Lake Mead Water Database*, <http://lakemead.water-data.com/>, (accessed 13 November, 2014).
- 51 M. Thomaz, A. Pagioro, M. Bini and J. Murphy, *Hydrobiologia*, 2006, **570**, 53-59.
- 52 Y. Xu, Q. Cai, X. Han, M. Shao and R. Liu, *Environ. Monit. Assess.*, 2010, **169(1-4)**, 237-248.
- 53 M. Yazgan, B. Armağan and M. Yeşilnacar, International Symposium on water resources and environmental impact assessment, Istanbul, 2001.
